# Supplementary material for: Chemical structure and optical signatures of nitrogen acceptors in MgZnO
Source: Royal Society of Chemistry journal article supplement (doi:10.1039/d0tc00826e), 2020-01-01
Supplement: d0tc00826e1.pdf [file d0tc00826e1.pdf]

Electronic Supplementary Information

**Chemical Structure and Optical Signatures of Nitrogen Acceptors  
in MgZnO**

M. Zakria<sup>1</sup>, P. Bove<sup>2</sup>, D. J. Rogers<sup>2,\*</sup>, F. H. Teherani<sup>2</sup>, E. V. Sandana<sup>2</sup>,  
M. R. Phillips<sup>1</sup>, and C. Ton-That<sup>1,\*</sup>

<sup>1</sup> *School of Mathematical and Physical Sciences, University of Technology Sydney, Ultimo,  
New South Wales 2007, Australia*

<sup>2</sup> *Nanovation, 8 Route de Chevreuse, 78117 Châteaufort, France*

\* Corresponding authors: d.j.rogers@nanovation.com, cuong.ton-that@uts.edu.au

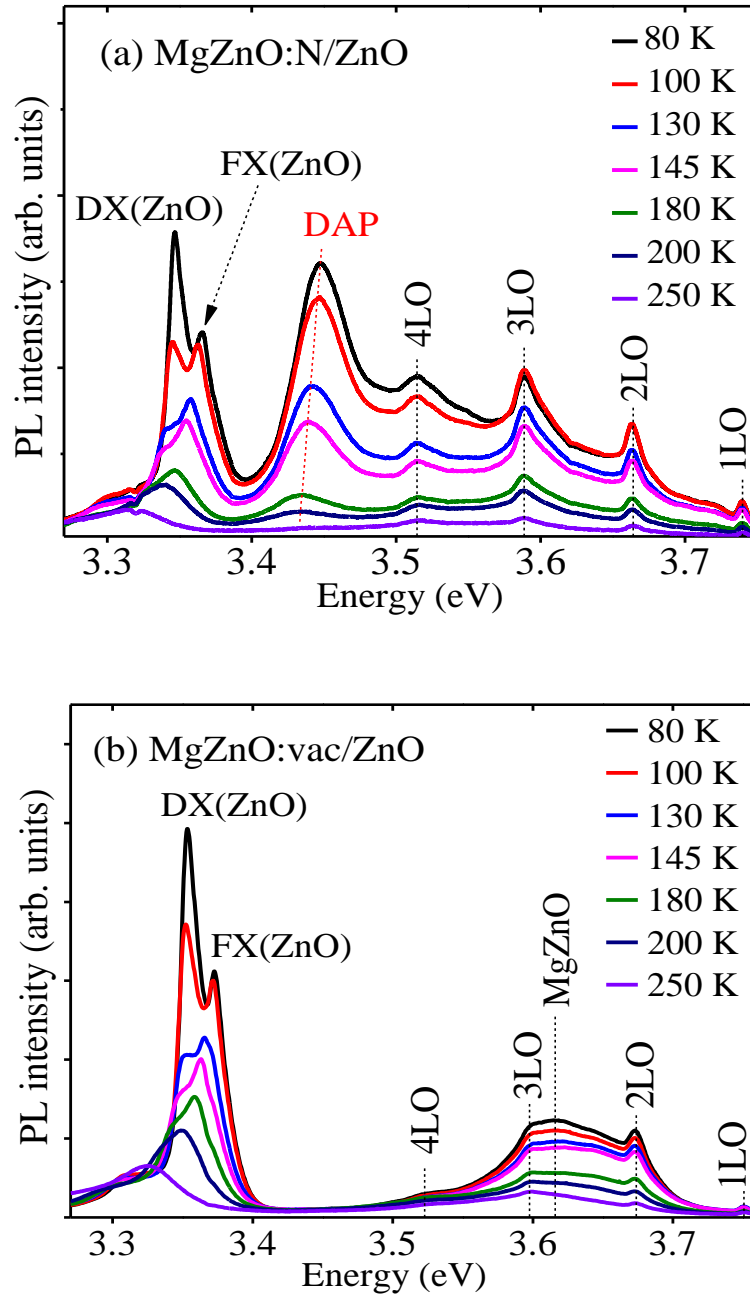

**Fig S1:** Temperature-resolved PL spectra for (a) MgZnO:N/ZnO and (b) MgZnO:vac/ZnO bilayer. The sharp peaks at ~3.35 and 3.37 eV at 80 K, are assigned to the recombination of free excitons (FX) and donor-bound excitons (DX) in the ZnO underlayer, respectively. The N-related DAP emission peaked at 3.45 eV at 80 K is dominant in the MgZnO:N layer; this emission is absent in the MgZnO:vac over the entire temperature range investigated. The periodic set of Raman peaks, labelled 1LO, 2LO, 3LO and 4LO, are due to multiphonon resonant Raman scattering.
